# Supplementary material
Source: ML conference proceedings conference paper supplement (https://openreview.net/forum?id=slsAQHpS7n)

# Variogram for a 5-dimensional isotropic SE kernel

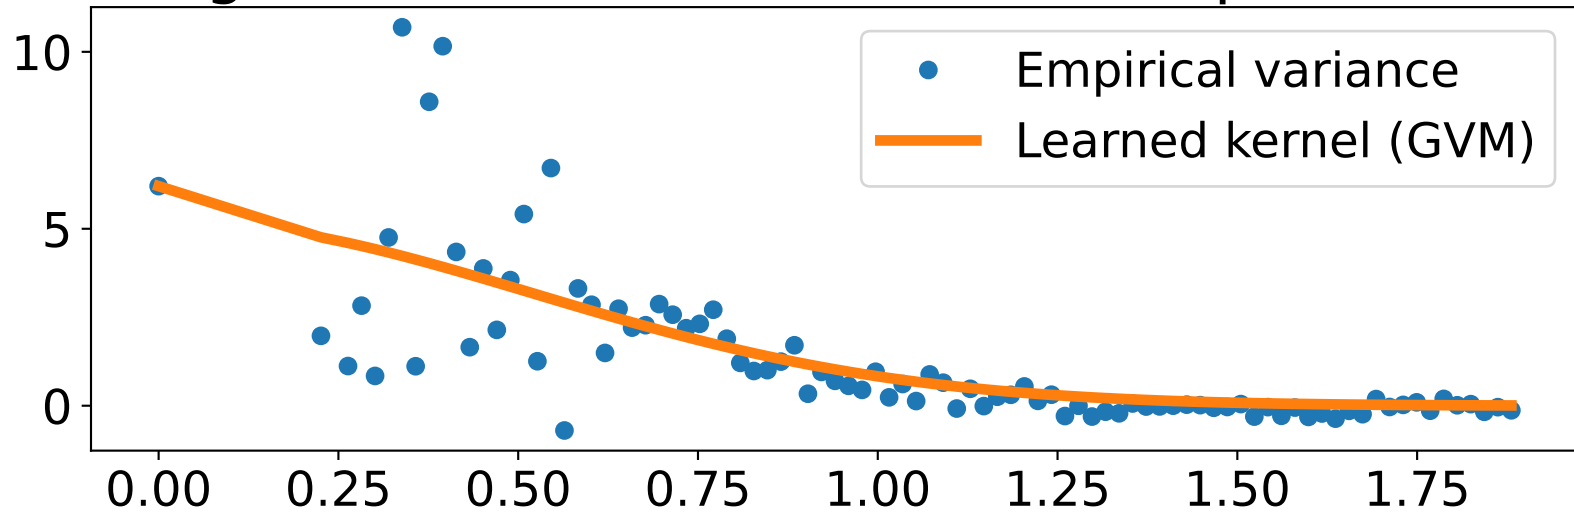

Supplement: supplementary_material [file attachment]
